# Supplementary material
Source: PubMed Central journal article supplement (PMC2717303)
Supplement: mmc1.pdf [file mmc1.pdf]

## Supporting Information

### Free Energy Perturbation (FEP) Simulation on Transition States and Redesign of Butyrylcholinesterase

Wenchao Yang,<sup>1,2,a</sup> Yongmei Pan,<sup>2,a</sup> Fang Zheng,<sup>2</sup> Hoon Cho,<sup>2</sup> Hsin-Hsiung Tai,<sup>2</sup> and Chang-Guo Zhan<sup>2,\*</sup>

<sup>1</sup>Key Laboratory of Pesticide & Chemical Biology of Ministry of Education, College of Chemistry, Central China Normal University, Wuhan 430079, P. R. China

<sup>2</sup>Department of Pharmaceutical Sciences, College of Pharmacy, University of Kentucky, 725 Rose Street, Lexington, KY 40536, USA

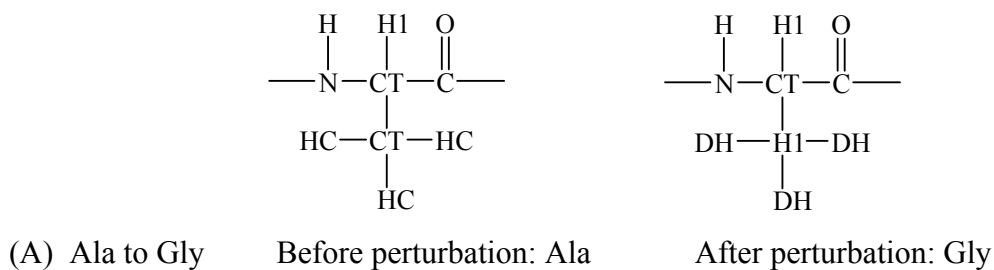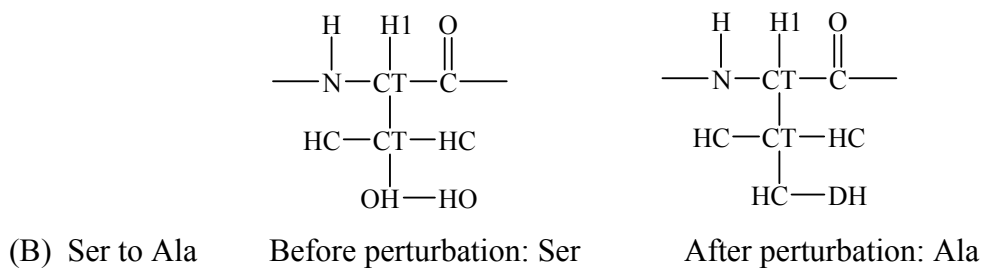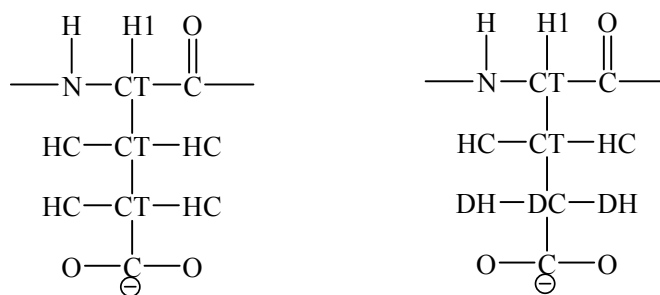

<sup>a</sup> These authors contributed equally to this work.

\* Corresponding author. E-mail: zhan@uky.edu

(C) Glu to Asp      Before perturbation: Glu      After perturbation: Asp

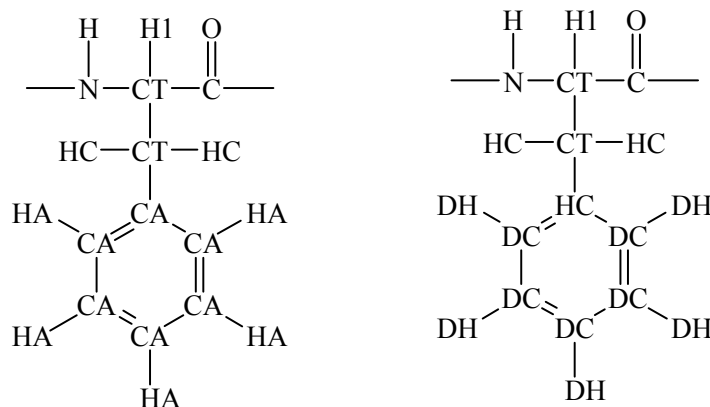

(D) Phe to Ala      Before perturbation: Phe      After perturbation: Ala

Figure S1. Structures and atom types before and after perturbations associated with (A) Ala to Gly (B) Ser to Ala (C) Glu to Asp (D) Phe to Ala.

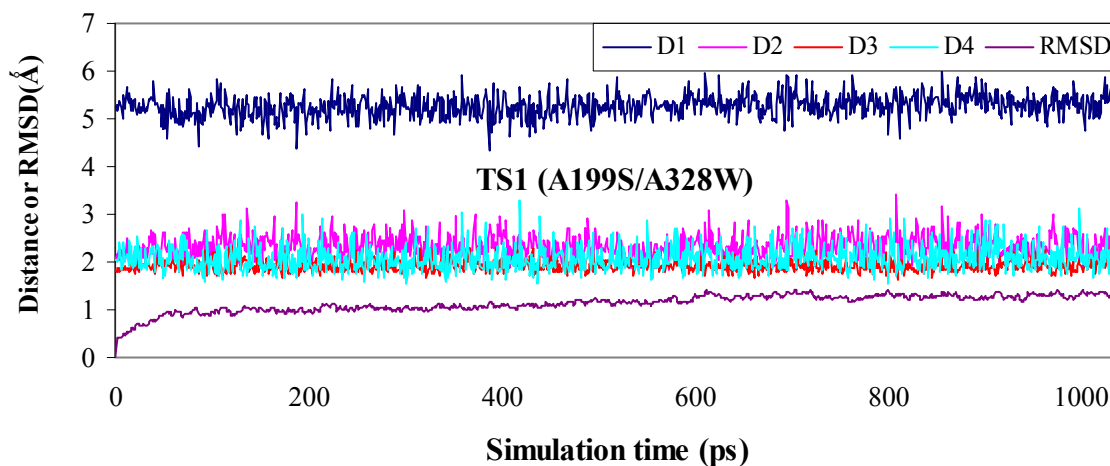

Figure S2. Plots of the key internuclear distances vs the time in the MD-simulated TS1 structure for (-)-cocaine hydrolysis catalyzed by A199S/A328W BChE. Traces D1, D2, and D3 refer to the distances between the carbonyl oxygen of (-)-cocaine and the hydrogen of G116, G117, and S199, respectively. Trace D4 is the internuclear distance between the carbonyl oxygen of (-)-cocaine benzoyl ester and the hydroxyl hydrogen of the S199 side chain. RMSD represents the root-mean-square deviation of the simulated positions of the protein backbone atoms from those in the initial structure.

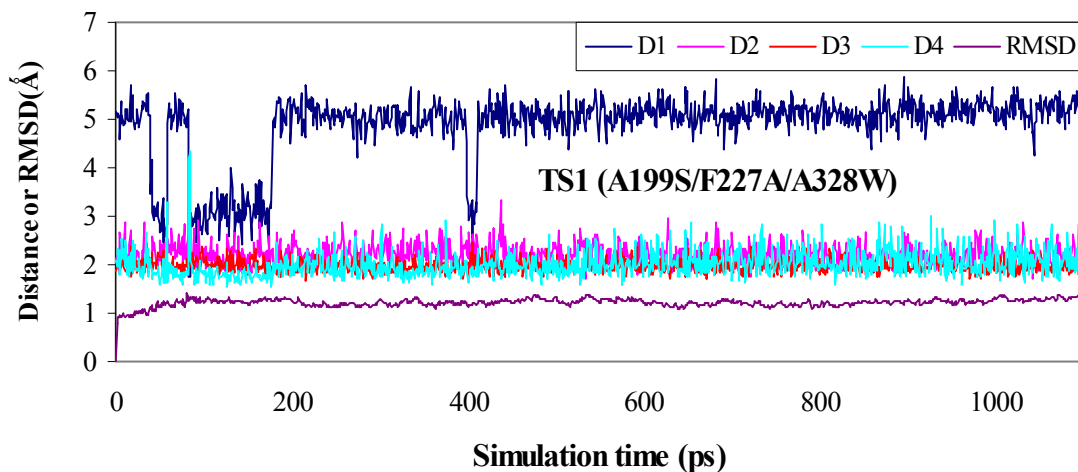

Figure S3. Plots of the key internuclear distances vs the time in the MD-simulated TS1 structure for (-)-cocaine hydrolysis catalyzed by A199S/F227A/A328W BChE. Traces D1, D2, and D3 refer to the distances between the carbonyl oxygen of (-)-cocaine and the hydrogen of G116, G117, and S199, respectively. Trace D4 is the internuclear distance between the carbonyl oxygen of (-)-cocaine benzoyl ester and the hydroxyl hydrogen of the S199 side chain. RMSD represents the root-mean-square deviation of the simulated positions of the protein backbone atoms from those in the initial structure.

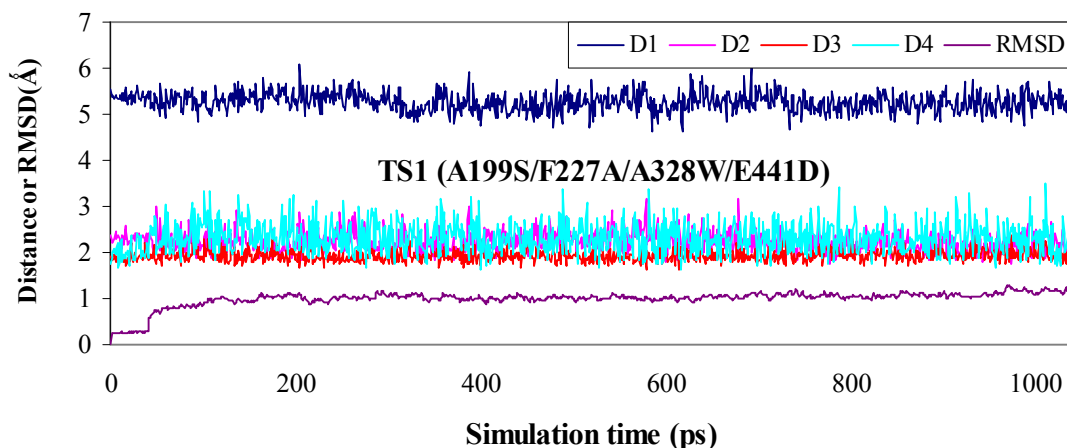

Figure S4. Plots of the key internuclear distances vs the time in the MD-simulated TS1 structure for (-)-cocaine hydrolysis catalyzed by A199S/F227A/A328W/E441D BChE. Traces D1, D2, and D3 refer to the distances between the carbonyl oxygen of (-)-cocaine and the hydrogen of G116, G117, and S199, respectively. Trace D4 is the internuclear distance between the carbonyl oxygen of (-)-cocaine benzoyl ester and the hydroxyl hydrogen of the S199 side chain. RMSD represents the root-mean-square deviation of the simulated positions of the protein backbone atoms from those in the initial structure.

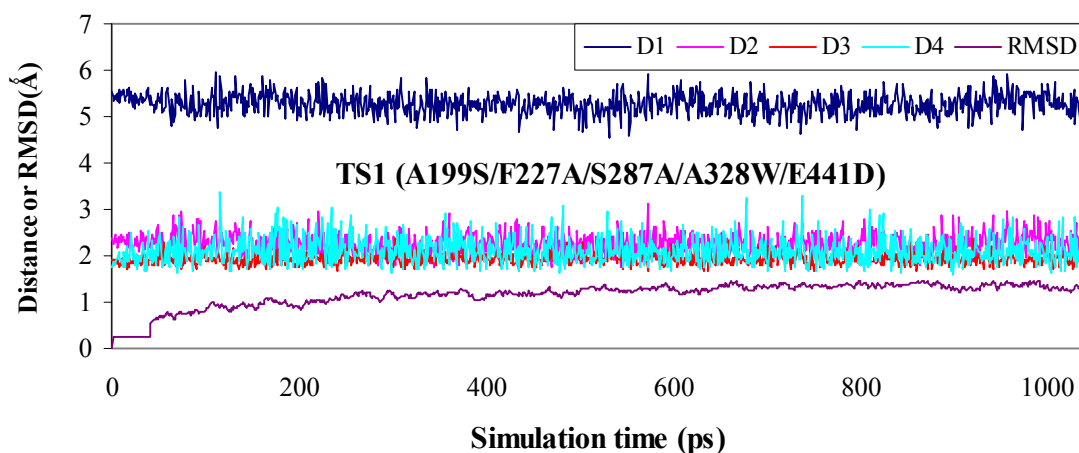

Figure S5. Plots of the key internuclear distances vs the time in the MD-simulated TS1 structure for (-)-cocaine hydrolysis catalyzed by A199S/F227A/S287A/A328W/E441D BChE. Traces D1, D2, and D3 refer to the distances between the carbonyl oxygen of (-)-cocaine and the hydrogen of G116, G117, and S199, respectively. Trace D4 is the internuclear distance between the carbonyl oxygen of (-)-cocaine benzoyl ester and the hydroxyl hydrogen of the S199 side chain. RMSD represents the root-mean-square deviation of the simulated positions of the protein backbone atoms from those in the initial structure.

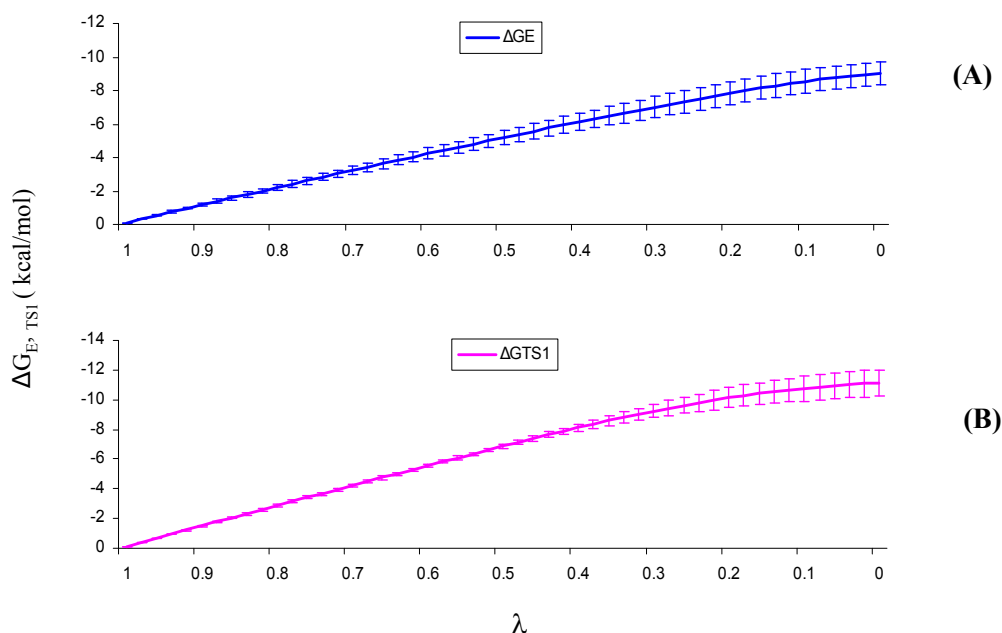

Figure S6. Incremental changes of  $\Delta G_E$  (A) and  $\Delta G_{TS1}$  (B) as function of  $\lambda$  for mutation from the free enzyme (A) or the TS1 structure (B) of A328W to A328W/A199S. The error bars indicate the standard deviation of each partial sum of the energy changes.

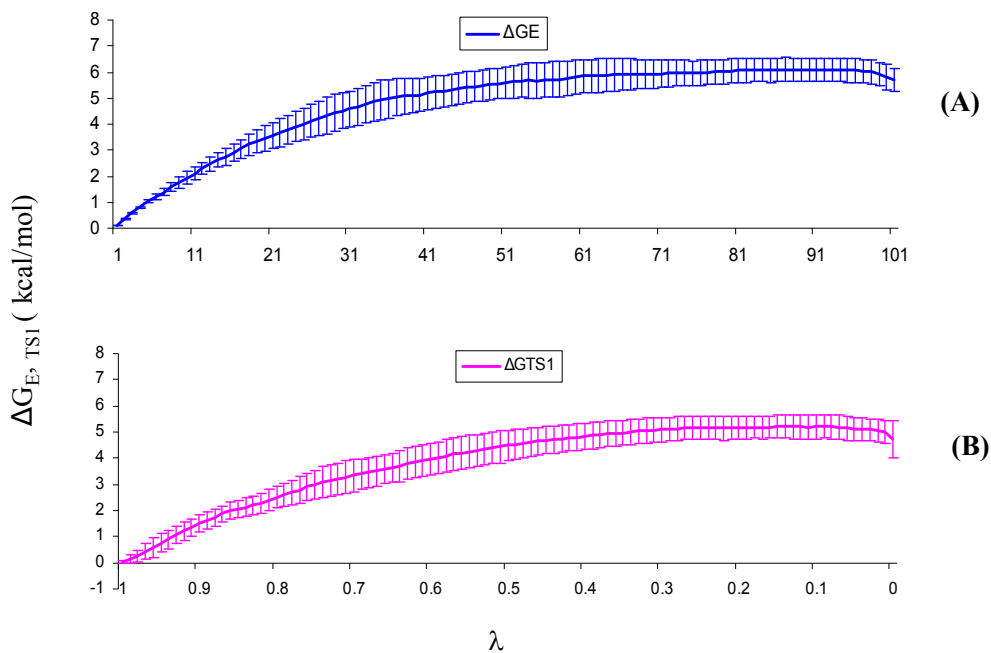

Figure S7. Incremental changes of  $\Delta G_E$  (A) and  $\Delta G_{TS1}$  (B) as function of  $\lambda$  for mutation from the free enzyme (A) or the TS1 structure (B) of A328W/A199S to A328W/A199S/F227A. The error bars indicate the standard deviation of each partial sum of the energy changes.

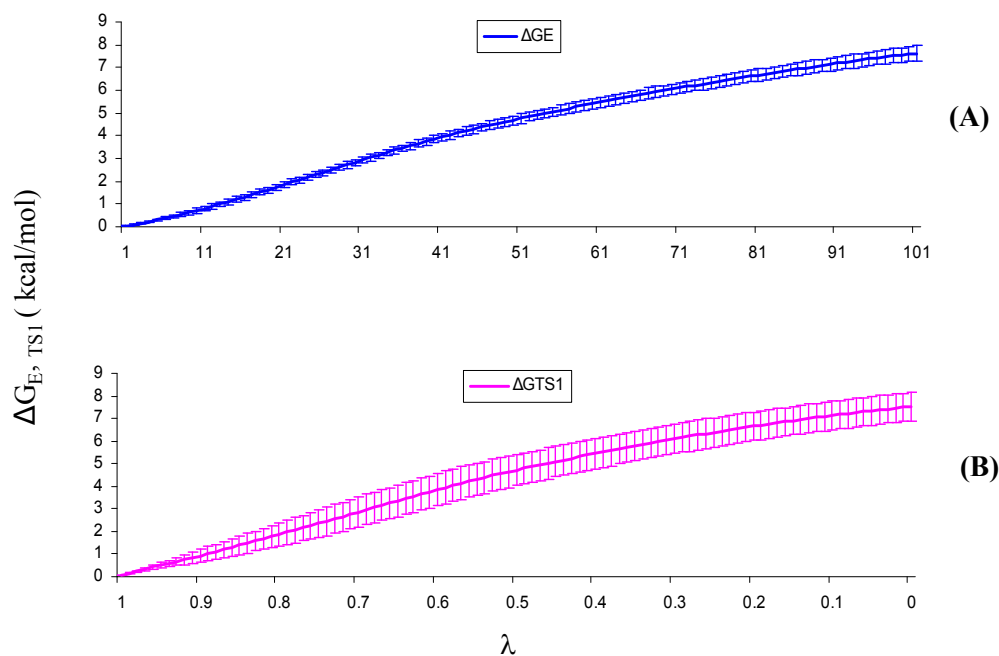

Figure S8. Incremental changes of  $\Delta G_E$  (A) and  $\Delta G_{TS1}$  (B) as function of  $\lambda$  for mutation from the free enzyme (A) or the TS1 structure (B) of A328W/A199S/F227A to A328W/A199S/F227/E441D. The error bars indicate the standard deviation of each partial sum of the energy changes.

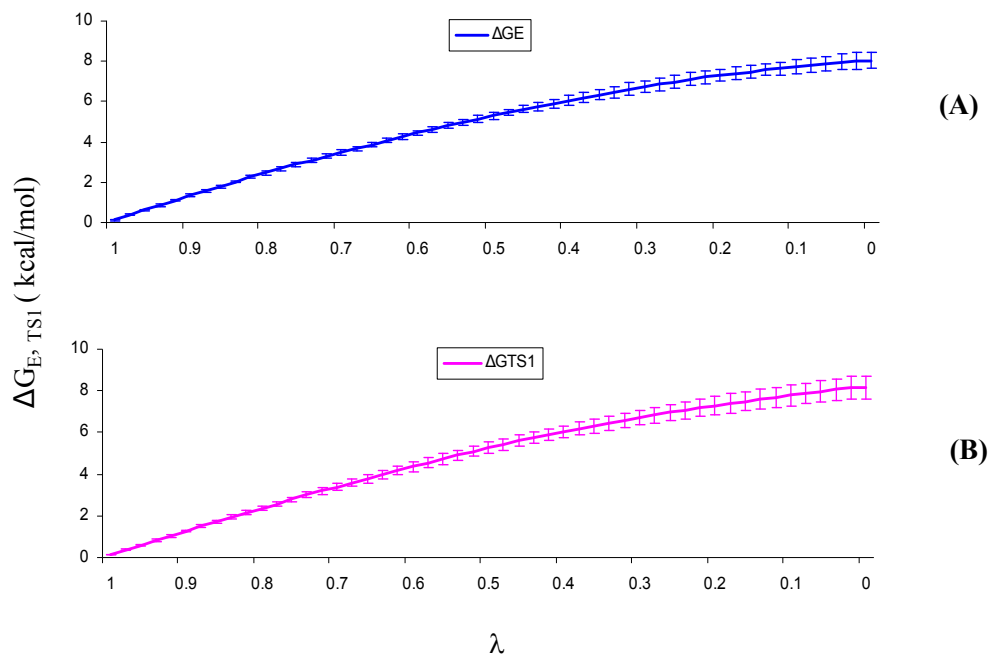

Figure S9. Incremental changes of  $\Delta G_E$  (A) and  $\Delta G_{TS1}$  (B) as function of  $\lambda$  for mutation from the free enzyme (A) or the TS1 structure (B) of A328W/A199S/F227A/E441D to A328W/A199S/F227A/S287A. The error bars indicate the standard deviation of each partial sum of the energy changes.

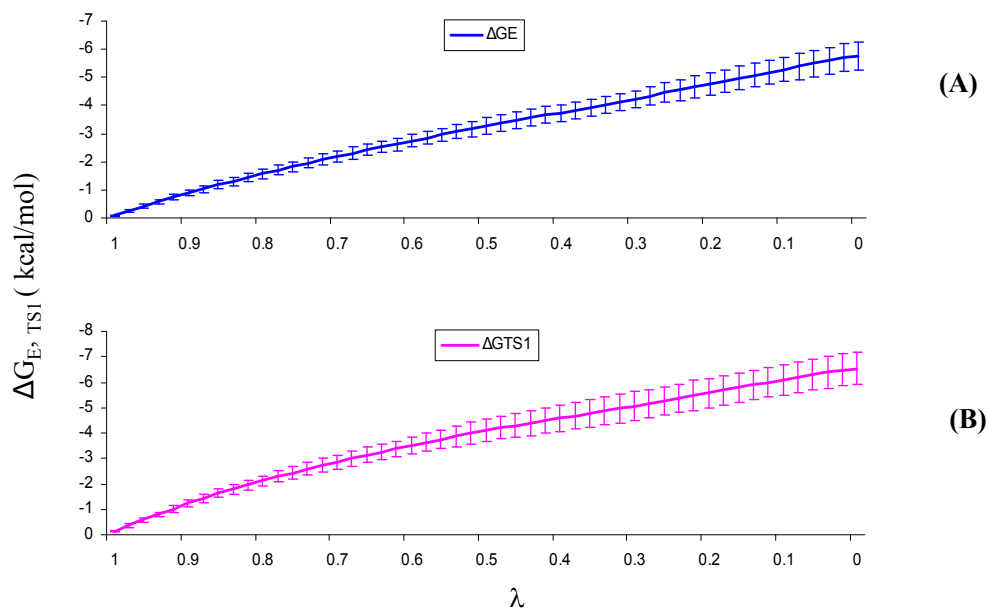

Figure S10. Incremental changes of  $\Delta G_E$  (A) and  $\Delta G_{TS1}$  (B) as function of  $\lambda$  for mutation from the free enzyme (A) or the TS1 structure (B) of A328W/A199S/F227A/E441D/S287A to A328W/A199S/F227A/E441D/S287G. The error bars indicate the standard deviation of each partial sum of the energy changes.

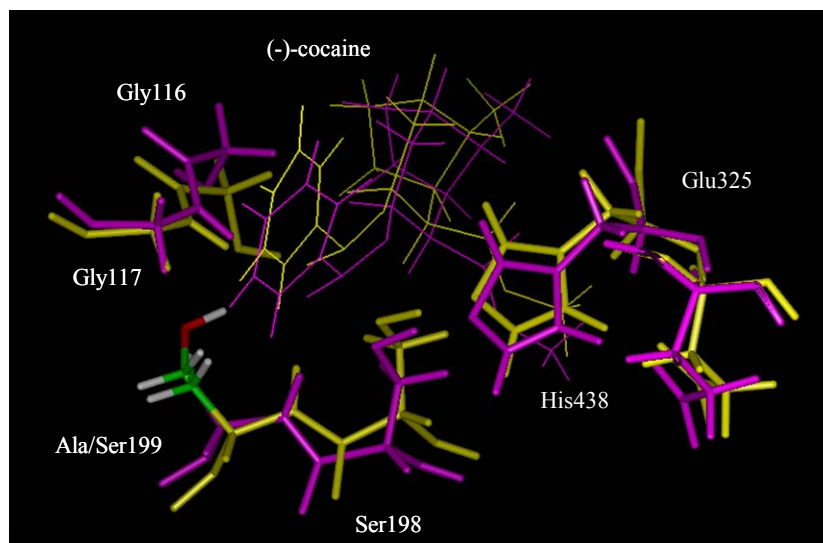

Figure S11. Superimposing of the TS1 structure corresponding to the A328W/A199S mutant (before the perturbation, magenta) with that corresponding to the mutant A328W (after the perturbation, yellow). The colors of the side chain atoms in residue Ser199 (before the perturbation) or Ala199 (after the perturbation) are shown according to their atom types

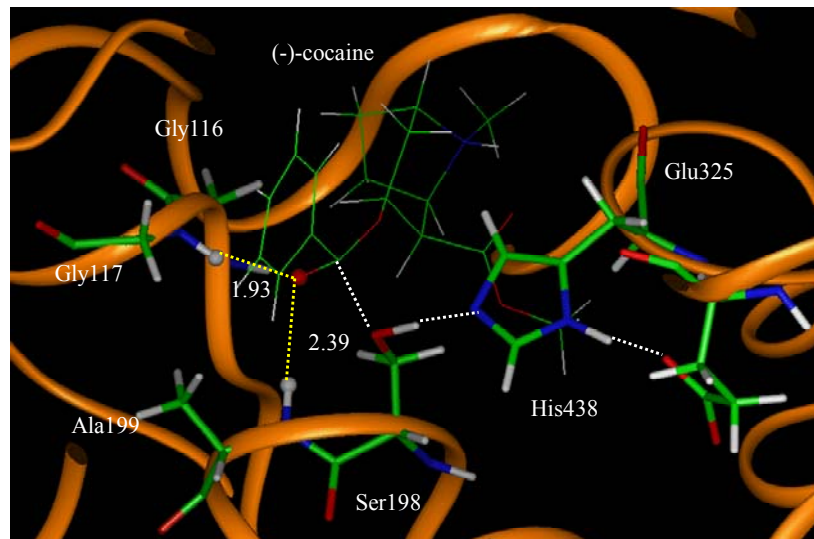

Figure S12. TS1 structure with the A328W mutant after the perturbation. The colors of key atoms are shown according to their atom types. The orange ribbon indicates the backbone of the molecule. The dashed lines in yellow indicate the hydrogen bonds between (-)-cocaine and the oxyanion hole of the mutant. The simulated average distances are given for the hydrogen bonds. The dashed lines in the white refer to the transition bonds. The atoms highlighted as balls include several key H atoms (grey balls) from the oxyanion hole of the protein and the O atom (red ball) of the (-)-cocaine carbonyl group.

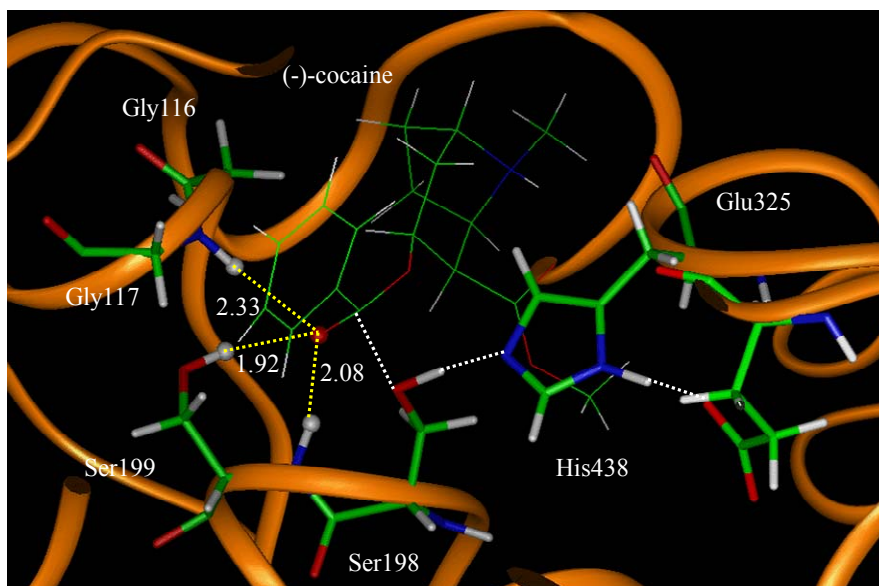

Figure S13. TS1 structure with the A199S/A328W mutant before the perturbation. The colors of key atoms are shown according to their atom types. The orange ribbon indicates the backbone of the molecule. The dashed lines in yellow indicate the hydrogen bonds between (-)-cocaine and the oxyanion hole of the mutant. The simulated average distances are given for the hydrogen bonds. The dashed lines in the white refer to the transition bonds. The atoms highlighted as balls include several key H atoms (grey balls) from the oxyanion hole of the protein and the O atom (red ball) of the (-)-cocaine carbonyl group.



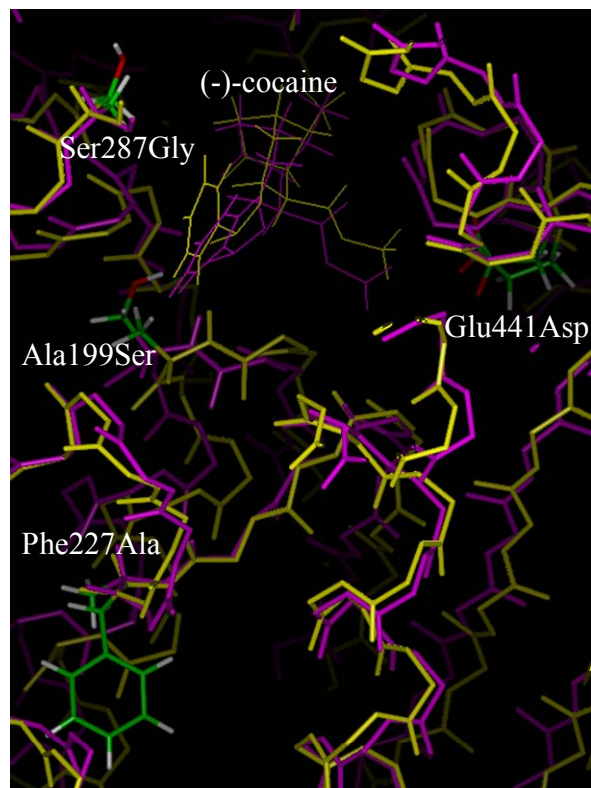

Figure S14. Superimposing of the two TS1 structures associated with the A328W mutant (yellow) and the A328W/A199S/F227A/E441D/S287G mutant (pink). The stick structures indicate the backbone of the TS1 structures. The four mutated residues are colored. This figure reveals that the active site cavity of the A328W/A199S/F227A/E441D/S287G mutant is slightly (not dramatically) larger than that of the A328W mutant.

### Details of parameter development

The lengths of the transition bonds and the partial charges of the cocaine atoms in the TS1 structure were defined and calculated based on the geometries obtained from previous *ab initio* reaction coordinate calculations on the cocaine hydrolysis catalyzed by wild-type BChE.<sup>20</sup> The atoms specific to the TS1 structure are given new atom types and the involving bond and angle parameters are defined in a separate file. In detail, for the atoms involving the transition bonds, for example the carbonyl carbon of the benzoyl ester of cocaine, which has partially formed bond with the hydroxyl oxygen of Ser198 in the TS1 structure, a new atom type is defined and the corresponding parameters are set according to the geometry calculated from *ab initio* calculation. Another two new atom types are defined for the hydroxyl hydrogen of the attacking Ser198 and the delta hydrogen of His438. Other parameters concerning the substrate and the protein are those defined by Amber.

## Parameter file of TS1 structure

Parameter file specific to transition state TS1

### MASS

|          |       |   |                                             |
|----------|-------|---|---------------------------------------------|
| cx 12.01 | 0.616 | ! | carbonyl carbon of benzoyl ester of cocaine |
| GN 1.008 | 0.161 |   | Hydrogen attached to delta N in His438      |
| GO 1.008 | 0.135 |   | Hydroxyl group H in Ser198                  |

### BOND

|       |       |       |                    |
|-------|-------|-------|--------------------|
| cx-os | 401.8 | 1.350 | COG in TS1         |
| cx-o  | 540.4 | 1.260 | COG in TS1         |
| cx-OH | 468.1 | 1.880 | COG in TS1         |
| cx-ca | 346.5 | 1.490 | COG in TS1         |
| GN-NA | 434.0 | 1.110 | HD1 in HIS of TS1  |
| GN-O2 | 434.0 | 1.430 | Added bond for TS1 |
| GO-OH | 553.0 | 1.120 | HG in SER of TS1   |
| GO-NB | 553.0 | 1.420 | added bond         |

### ANGLE

|          |        |         |                                    |
|----------|--------|---------|------------------------------------|
| os-c -ca | 67.662 | 110.765 | Calculated with empirical approach |
| cx-os-c3 | 63.0   | 116.91  | NEW_MP2/6-31G COG                  |
| o -cx-os | 75.4   | 123.89  | MP2/6-31G* COG                     |
| os-cx-ca | 67.662 | 110.765 | same as os-c -ca                   |
| ca-cx-o  | 67.1   | 126.40  | NEW_MP2/6-31G COG                  |
| cx-ca-ca | 62.0   | 122.13  | NEW_MP2/6-31G COG                  |
| ct-OH-cx | 50.5   | 109.50  | new type for COG and ser197        |
| CT-OH-cx | 50.5   | 109.50  | new type for COG and ser197        |
| OH-cx-os | 60.5   | 110.02  | new type reduced force             |
| OH-cx-o  | 60.5   | 110.02  | only bond length important         |
| ca-cx-OH | 50.9   | 120.00  |                                    |
| cx-OH-GO | 50.9   | 109.06  | above are for COG                  |
| cx-OH-HO | 50.9   | 109.06  | above are for COG                  |
| CC-NA-GN | 50.0   | 125.00  | GN is H in his in TS1              |
| CR-NA-GN | 50.0   | 125.00  | GN is H, his in TS1                |
| CT-OH-GO | 55.0   | 108.50  | GO is HG in SER for TS1            |
| C -O2-GN | 50.1   | 160.00  |                                    |
| O2-GN-NA | 50.1   | 170.00  |                                    |
| OH-GO-NB | 50.1   | 160.00  |                                    |
| GO-NB-CR | 50.1   | 125.00  |                                    |
| GO-NB-CV | 50.1   | 125.00  |                                    |

### DIHE

|                     |   |        |         |       |                  |
|---------------------|---|--------|---------|-------|------------------|
| X -cx-os-X          | 2 | 5.400  | 180.000 | 2.000 |                  |
| X -cx-ca-X          | 4 | 14.500 | 180.000 | 2.000 |                  |
| intrpol.bsd.on C6H6 |   |        |         |       |                  |
| X -cx-OH-X          | 2 | 0.000  | 0.000   | 3.000 | 3-fold, no force |
| CT-C -O2-GN         | 2 | 0.000  | 180.000 | 2.000 |                  |
| C -O2-GN-NA         | 2 | 0.000  | 180.000 | 2.000 |                  |
| O2-C -O2-GN         | 2 | 0.000  | 180.000 | 2.000 |                  |
| O2-GN-NA-CC         | 2 | 0.000  | 180.000 | 2.000 |                  |
| O2-GN-NA-CR         | 2 | 0.000  | 180.000 | 2.000 |                  |
| CT-OH-GO-NB         | 2 | 0.000  | 180.000 | 2.000 |                  |
| OH-GO-NB-CR         | 2 | 0.000  | 180.000 | 2.000 |                  |

|             |   |       |         |       |
|-------------|---|-------|---------|-------|
| OH-GO-NB-CV | 2 | 0.000 | 180.000 | 2.000 |
| cx-OH-GO-NB | 2 | 0.000 | 180.000 | 2.000 |

IMPROPER

|                      |     |       |     |               |
|----------------------|-----|-------|-----|---------------|
| c3-o -c -os<br>value | 1.1 | 180.0 | 2.0 | Using default |
| ca-o -c -os<br>value | 1.1 | 180.0 | 2.0 | Using default |
| c -ca-ca-ca<br>value | 1.1 | 180.0 | 2.0 | Using default |
| ca-ca-ca-ha<br>value | 1.1 | 180.0 | 2.0 | Using default |
| c3-o -cx-os<br>value | 1.1 | 180.0 | 2.0 | Using default |
| ca-o -cx-os<br>value | 1.1 | 180.0 | 2.0 | Using default |
| cx-ca-ca-ca<br>value | 1.1 | 180.0 | 2.0 | Using default |

NONBON

|    |        |        |               |
|----|--------|--------|---------------|
| cx | 1.9080 | 0.0860 | OPLS (c type) |
| GN | 0.6000 | 0.0157 | Hydrogen on N |
| GO | 0.0000 | 0.0000 | Hydroxyl H    |

**Partial charges on cocaine atoms in TS1 structure**

| Atom | atom type | charge |
|------|-----------|--------|
| C1   | c3        | -0.082 |
| H2   | h1        | 0.122  |
| H3   | h1        | 0.122  |
| H4   | h1        | 0.122  |
| O5   | os        | -0.335 |
| C6   | c         | 0.665  |
| O7   | o         | -0.573 |
| C8   | c3        | -0.021 |
| H9   | hc        | 0.073  |
| C10  | c3        | -0.018 |
| N20  | n4        | -0.020 |
| C22  | c3        | -0.263 |
| H23  | hx        | 0.146  |
| H24  | hx        | 0.146  |
| H25  | hx        | 0.146  |
| H21  | hn        | 0.394  |
| H11  | hx        | 0.104  |
| C12  | c3        | -0.067 |
| H13  | hc        | 0.069  |
| H14  | hc        | 0.076  |
| C15  | c3        | -0.101 |
| H16  | hc        | 0.077  |
| H17  | hc        | 0.078  |
| C18  | c3        | 0.023  |
| H19  | hx        | 0.106  |
| C26  | c3        | -0.144 |
| H27  | hc        | 0.079  |
| H28  | hc        | 0.102  |
| C29  | c3        | 0.111  |
| H30  | h1        | 0.152  |

|     |    |        |
|-----|----|--------|
| O31 | os | -0.349 |
| C32 | cx | 0.580  |
| O33 | o  | -0.625 |
| C34 | ca | -0.036 |
| C35 | ca | -0.098 |
| H36 | ha | 0.154  |
| C37 | ca | -0.147 |
| H38 | ha | 0.154  |
| C39 | ca | -0.093 |
| H40 | ha | 0.157  |
| C41 | ca | -0.150 |
| H42 | ha | 0.154  |
| C43 | ca | -0.119 |
| H44 | ha | 0.129  |

### Force field parameters for perturbed residues

#### Perturbed Gly from Ala

##### MASS

DH 0.00                    0.0 !

##### BOND

H1-DH    340.0    1.09

##### ANGLE

DH-H1-DH    35.0            109.50

DH-H1-CT    50                    109.50

##### DIHE

|             |   |     |    |    |
|-------------|---|-----|----|----|
| H1-CT-C-N   | 1 | 0.0 | 0. | 4. |
| H1-CT-C-N   | 1 | 0.0 | 0. | 2. |
| C-N-CT-H1   | 1 | 0.0 | 0. | 1. |
| C-N-CT-H1   | 1 | 0.0 | 0. | 3. |
| C-N-CT-H1   | 1 | 0.0 | 0. | 4. |
| C-N-CT-H1   | 1 | 0.0 | 0. | 2. |
| C-N-CT-CT   | 1 | 0.0 | 0. | 2. |
| C-N-CT-CT   | 1 | 0.0 | 0. | 1. |
| C-N-CT-CT   | 1 | 0.0 | 0. | 3. |
| C-N-CT-CT   | 1 | 0.0 | 0. | 4. |
| DH-H1-CT-N  | 1 | 0.0 | 0. | 3. |
| DH-H1-CT-H1 | 1 | 0.0 | 0. | 3. |
| O-C-CT-CT   | 1 | 0.0 | 0. | 1. |
| O-C-CT-CT   | 1 | 0.0 | 0. | 2. |
| O-C-CT-H1   | 1 | 0.0 | 0. | 2. |
| O-C-CT-H1   | 1 | 0.0 | 0. | 1. |
| O-C-CT-H1   | 1 | 0.0 | 0. | 3. |
| O-C-CT-CT   | 1 | 0.0 | 0. | 3. |
| C-CT-H1-DH  | 1 | 0.0 | 0. | 3. |

##### IMPROPER

|             |  |     |     |    |
|-------------|--|-----|-----|----|
| H1-DH-DH-DH |  | 0.0 | 0.  | 2  |
| CT-DH-HC-DH |  | 0.0 | 0.0 | 2. |

##### NONBON

DH                    0.00    0.0

**Perturbed Ala from Ser**

MASS

DH 0.00 0.0 !

BOND

HC-DH 553.0 0.96

ANGLE

CT-HC-DH 55.0 108.50

DIHE

|             |   |      |     |     |
|-------------|---|------|-----|-----|
| DH-HC-CT-HC | 1 | 0.00 | 0.0 | 3.  |
| CT-CT-HC-DH | 1 | 0.00 | 0.0 | 3.0 |
| CT-CT-HC-DH | 1 | 0.00 | 0.0 | 2.0 |
| CT-CT-HC-DH | 1 | 0.0  | 0.  | 1   |
| H1-CT-C-N   | 1 | 0.0  | 0.  | 4   |
| CT-CT-OH-HO | 1 | 0.0  | 0.  | 1   |
| CT-CT-OH-HO | 1 | 0.0  | 0.  | 2   |
| CT-CT-OH-HO | 1 | 0.0  | 0.  | 3   |
| H1-CT-OH-HO | 1 | 0.0  | 0.  | 2   |
| H1-CT-OH-HO | 1 | 0.0  | 0.  | 3   |
| H1-CT-OH-HO | 1 | 0.0  | 0.  | 2   |
| H1-CT-CT-HC | 1 | 0.0  | 0.  | 1   |
| H1-CT-CT-HC | 1 | 0.0  | 0.  | 3   |
| H1-CT-CT-HC | 1 | 0.0  | 0.  | 3   |
| H1-CT-CT-OH | 1 | 0.0  | 0.  | 3   |
| H1-CT-CT-OH | 1 | 0.0  | 0.  | 1   |
| H1-CT-CT-H1 | 1 | 0.0  | 0.  | 1   |
| H1-CT-CT-H1 | 1 | 0.0  | 0.  | 3   |
| H1-CT-C-N   | 1 | 0.0  | 0.  | 2   |
| HC-CT-HC-DH | 1 | 0.0  | 0.  | 2.  |
| C-CT-H1-DH  | 1 | 0.0  | 0.  | 3.  |
| C-N-CT-H1   | 1 | 0.0  | 0.  | 1   |
| C-N-CT-H1   | 1 | 0.0  | 0.  | 4   |
| C-N-CT-H1   | 1 | 0.0  | 0.  | 3   |
| C-N-CT-H1   | 1 | 0.0  | 0.  | 2   |
| C-N-CT-CT   | 1 | 0.0  | 0.  | 1   |
| C-N-CT-CT   | 1 | 0.0  | 0.  | 2   |
| C-N-CT-CT   | 1 | 0.0  | 0.  | 3   |
| C-N-CT-CT   | 1 | 0.0  | 0.  | 4   |
| O-C-CT-CT   | 1 | 0.0  | 0.  | 1   |
| O-C-CT-CT   | 1 | 0.0  | 0.  | 3   |
| O-C-CT-CT   | 1 | 0.0  | 0.  | 2   |
| O-C-CT-H1   | 1 | 0.0  | 0.  | 2   |
| O-C-CT-H1   | 1 | 0.0  | 0.  | 1   |
| O-C-CT-H1   | 1 | 0.0  | 0.  | 3   |
| H1-CT-OH-HO | 1 | 0.0  | 0.  | 1.  |
| HC-CT-HC-DH | 1 | 0.0  | 0.  | 1.  |
| HC-CT-HC-DH | 1 | 0.0  | 0.  | 2   |
| HC-CT-HC-DH | 1 | 0.0  | 0.  | 3.  |

IMPROPER

NA-CA-CN-CB 0.0 0. 2.

NONBON

DH 0.00 0.0

**Perturbed Asp from Glu**

MASS

|    |      |     |   |                |
|----|------|-----|---|----------------|
| DC | 0.00 | 0.0 | ! | gamma C of Glu |
| DH | 0.00 | 0.0 |   |                |

BOND

|       |       |       |
|-------|-------|-------|
| DC-DH | 340.0 | 1.090 |
| CT-DC | 317.0 | 0.76  |
| DC-C  | 310.0 | 0.76  |

ANGLE

|          |      |        |
|----------|------|--------|
| CT-DC-C  | 63.0 | 180.00 |
| DC-CT-CT | 40.0 | 180.0  |
| DC-C-O2  | 70.0 | 117.00 |
| DH-DC-DH | 35.0 | 109.50 |
| DH-DC-C  | 50.0 | 60.0   |
| DH-DC-CT | 50.0 | 60.0   |
| HC-CT-DC | 50.0 | 109.50 |

DIHE

|             |   |     |    |    |
|-------------|---|-----|----|----|
| DH-DC-C-O2  | 1 | 0.0 | 0. | 2. |
| DH-DC-C-O2  | 1 | 0.0 | 0. | 3. |
| DC-CT-CT-C  | 1 | 0.0 | 0. | 2. |
| DC-CT-CT-C  | 1 | 0.0 | 0. | 3. |
| HC-CT-DC-DH | 1 | 0.0 | 0. | 2. |
| HC-CT-DC-DH | 1 | 0.0 | 0. | 3. |
| HC-CT-DC-C  | 1 | 0.0 | 0. | 2. |
| HC-CT-DC-C  | 1 | 0.0 | 0. | 3. |
| CT-DC-C-O2  | 1 | 0.0 | 0. | 2. |
| CT-DC-C-O2  | 1 | 0.0 | 0. | 3. |
| CT-CT-DC-DH | 1 | 0.0 | 0. | 2. |
| CT-CT-DC-DH | 1 | 0.0 | 0. | 3. |
| CT-CT-DC-C  | 1 | 0.0 | 0. | 2. |
| CT-CT-DC-C  | 1 | 0.0 | 0. | 3. |
| HC-CT-CT-HC | 1 | 0.0 | 0. | 2. |
| HC-CT-CT-HC | 1 | 0.0 | 0. | 3. |
| HC-CT-CT-C  | 1 | 0.0 | 0. | 2. |
| HC-CT-CT-C  | 1 | 0.0 | 0. | 3. |
| CT-CT-C-O2  | 1 | 0.0 | 0. | 3. |
| CT-CT-C-O2  | 1 | 0.0 | 0. | 2. |
| CT-CT-CT-HC | 1 | 0.0 | 0. | 2. |
| CT-CT-CT-HC | 1 | 0.0 | 0. | 3. |
| CT-CT-CT-C  | 1 | 0.0 | 0. | 2. |
| CT-CT-CT-C  | 1 | 0.0 | 0. | 3. |
| HC-CT-C-O2  | 1 | 0.0 | 0. | 3. |
| CT-CT-CT-C  | 1 | 0.0 | 0. | 2. |
| CT-CT-CT-C  | 1 | 0.0 | 0. | 3. |

IMPROPER

|             |     |    |    |
|-------------|-----|----|----|
| CT-DH-DC-C  | 0.0 | 0. | 2. |
| CT-DH-DC-C  | 0.0 | 0. | 3. |
| DH-DH-DC-C  | 0.0 | 0. | 2. |
| CT-HC-CT-DC | 0.0 | 0. | 2. |
| CT-HC-CT-DC | 0.0 | 0. | 3. |
| HC-HC-CT-DC | 0.0 | 0. | 2. |
| CT-DH-DC-DH | 0.0 | 0. | 2. |
| CT-HC-CT-HC | 0.0 | 0. | 2. |

|             |     |    |    |
|-------------|-----|----|----|
| CT-HC-CT-C  | 0.0 | 0. | 2. |
| CT-HC-CT-C  | 0.0 | 0. | 3. |
| CT-HC-CT-CT | 0.0 | 0. | 2. |
| CT-HC-CT-CT | 0.0 | 0. | 3. |
| HC-HC-CT-CT | 0.0 | 0. | 2. |
| HC-HC-CT-C  | 0.0 | 0. | 2. |

NONBON

|    |      |     |
|----|------|-----|
| DC | 0.00 | 0.0 |
| DH | 0.00 | 0.0 |

**Perturbed Ala from Phe**

MASS

|    |      |     |   |                        |
|----|------|-----|---|------------------------|
| DH | 0.00 | 0.0 | ! |                        |
| DC | 0.00 | 0.0 |   | aromatic carbon of Phe |

BOND

|       |       |      |
|-------|-------|------|
| DC-DH | 367.0 | 1.08 |
| HC-DC | 469.0 | 1.40 |
| DC-DC | 469.0 | 1.40 |

ANGLE

|          |      |        |
|----------|------|--------|
| DC-DC-DH | 50.0 | 120.00 |
| HC-DC-DC | 63.0 | 120.00 |
| HC-DC-DH | 50.0 | 120.0  |
| CT-HC-DC | 70.0 | 120.0  |
| DC-DC-DC | 63.0 | 120.0  |
| DC-HC-DC | 63.0 | 120.0  |

DIHE

|             |   |      |       |     |
|-------------|---|------|-------|-----|
| DH-HC-CT-HC | 1 | 0.0  | 0.0   | 3.  |
| CB-HC-CT-CT | 1 | 0.0  | 0.0   | 1   |
| CT-CT-HC-DH | 1 | 0.0  | 0.0   | 3.0 |
| CT-CT-HC-DH | 1 | 0.0  | 0.0   | 2.0 |
| CT-CT-HC-DH | 1 | 0.0  | 0.0   | 1   |
| DC-HC-CT-HC | 1 | 0.0  | 0.0   | 1   |
| HC-CT-HC-DH | 1 | 0.0  | 0.0   | 2.  |
| CT-CT-HC-DC | 6 | 0.0  | 0.0   | 2   |
| CT-CT-HC-DC | 6 | 0.0  | 0.0   | 1   |
| CT-CT-HC-DC | 6 | 0.0  | 0.0   | 3   |
| HC-CT-HC-DC | 6 | 0.0  | 0.0   | 2   |
| DC-HC-CT-HC | 6 | 0.0  | 0.0   | 3   |
| HC-DC-DC-DH | 4 | 14.5 | 180.0 | 2   |
| CT-DC-HC-DC | 4 | 14.5 | 180.0 | 2   |

IMPROPER

|             |     |     |    |
|-------------|-----|-----|----|
| CT-DH-HC-DH | 0.0 | 0.0 | 2. |
| HC-DH-DC-DC | 0.0 | 0.0 | 2. |
| DC-DH-DC-DC | 0.0 | 0.0 | 2. |
| DC-DH-DC-DC | 0.0 | 0.0 | 2. |
| HC-DC-DC-DH | 0.0 | 0.0 | 2. |
| CT-DC-HC-DC | 0.0 | 0.0 | 2. |

NONBON

|    |      |     |
|----|------|-----|
| DH | 0.00 | 0.0 |
| DC | 0.00 | 0.0 |
